# Supplementary material for: Knowledge and attitude of emergency physician about the emergency management of tooth avulsion
Source: Springer Nature journal article supplement (doi:10.1186/s12903-018-0515-5), 2018-04-02
Supplement: MOESM1 [file 15582966]

**Traumatic Dental Injuries**

**1- Gender**

a- Male

b- Female

**2- Age**

a- 20-29

b- 30-39

c- 40-49

d- > 50

**3- Place of work .....**

**4- Occupation .....**

**5- Specialty .....**

**6- Nationality .....**

**7- What is avulsion of a tooth?**

- a. Total dislodgement of intact tooth out of its socket due to any trauma
- b. Dislodgement of fractured segment of the tooth due to any trauma
- c. Tooth fracture due to any trauma
- d. Gum bleeding due to any trauma
- e. Don't know

**8- Do you have any prior knowledge about the management of avulsed tooth?**

- a- Yes
- b- No

**9- If yes what was your source of information?**

- a. Residency program.
- b. Health talks on television or radio.
- c. Conference/Convention.
- d. Medical books.
- e. Others (specify).....

**10- Have you ever come across a patient with avulsed tooth (knocked out)?**

- a- Yes
- b- No

**11- Did you or would you refer the child or instruct the parents to go to the dentist after avulsion?**

- a- Yes
- b- No

**12- If YES, When will you advise the parents to go to the dentist?**

- a- Immediately
- b- Next day
- c- After few days, when the child is comfortable
- d - Only if any pain or other symptoms are noticed

**13- A boy came to you with a knocked-out permanent anterior tooth in his hand after the accident. What will you do with the tooth?**

- a- Save
- b- Discard
- c- Put the tooth back into the socket (its place)

**14- If you decided to save the tooth, what will you do with it?**

- a- Wash with water/ other liquid
- b- Clean it with a tissue paper
- c- Nothing (leave it as it is)

**If you were at a site where a child knocked-out his permanent front tooth.**

**15- Would you advise the parents to look for the avulsed tooth?**

- a- Yes
- b- No

**16- Do you think it is necessary to save avulsed permanent tooth?**

- a- Yes
- b- No

**17- Do you think that the avulsed permanent tooth can be put back?**

- a- Yes
- b- No

**18- If YES, will you do it by yourself?**

- a- Yes
- b- No

**19- If you decided to replant the tooth into its socket, but it has fallen onto the ground and is covered with dirt, what would you do?**

- a- Rinse the tooth under running water.
- b- Gently wipe off the dirt that is stuck to the tooth by hand.
- c- Scrub the tooth gently with a toothbrush.
- d- Spray alcohol on the tooth.
- e- Put the tooth straight back into the socket, with no pretreatment.
- f- Don't know/other .....

**20- What would you do if the tooth was in child's mouth, however, out of place?**

- a- Put the tooth back into the socket (its place)
- b- Leave the tooth inside the mouth
- d- Remove the tooth outside the mouth

**21- If you did not replant the tooth, would you advise the parents to take the tooth to the dentist?**

- a- Yes
- b- No

**22- Is extra oral time is important?**

- a- Yes
- b- No
- c- Don't know

**23- When should the tooth be put back, if it had been knocked out of the mouth?**

- a- Immediately
- b- As soon as the bleeding has stopped
- c- During the first hour
- d- Within the same day
- e- After few days
- f- When visiting the dentist
- g- Don't know

**24- If you did not replant the tooth, How would you carry the tooth to the dentist?**

- a- Wrap in paper or gauze
- b- Pack the tooth in ice
- c- Put in Water
- d- Put in Milk
- e- Put in Saline
- f- Put in alcohol
- f- Hold the tooth in the child's mouth.
- h- Put in disinfecting solution

**25- How to hold an avulsed tooth?**

- a- From the crown
- b- From the root
- c- Anywhere (crown or root)
- d- Don't know

**26- Can you differentiate if the tooth is primary or permanent?**

- a. Yes
- b. No

**27- Would you care if the tooth that has been knocked-out was a primary tooth?**

- a. Yes
- b. No
- c. Don't know

**28- What do you think is your level of information about traumatic dental injuries?**

- a- Adequate
- b- Inadequate
- c- Don't know

**29- In your opinion, learning about traumatic dental injuries is:**

- a- Not important
- b- Important
- c- Somewhat important
- d- Very important

**30- Would you like to receive more information in order to properly manage traumatic dental injuries?**

- a- Yes
- b- No

**31- Are you interested in knowing the emergency management of avulsed tooth?**

- a- Yes
- b- No
